# Supplementary material for: Creatine Kinase Equilibration and ΔGATP Over an Extended Range of Physiological Conditions: Implications for Cellular Energetics, Signaling and Muscle Performance
Source: Preprints.org preprint supplement (doi:10.20944/preprints202308.1711.v1), 2023-08-24
Supplement: Supplementary file 2 [file supplementary]

## Sheet: Sheet1
data for Wiseman, R. W., Brown, C. M., Beck, T. W., Brault, J. J., Reinoso, T. R., Shi, Y., Chase, P. B. (2023). Creatine Kinase Equilibration and ΔGATP Over an Extended Range of Physiological Conditions: Implications for Cellular Energetics, Signaling and Muscle Performance. IJMS, accepted pending minor revisions.

## Sheet: Figure 2A-C
temperature (oC)	pH	Pi NMR chemical shift	pMg	color by temperature
10	6	0.536	2	blue
10	6.5	1.093	2	blue
10	7	1.713	2	blue
10	7.5	2.099	2	blue
10	8	2.257	2	blue
20	6	0.63	2	green
20	6.5	1.291	2	green
20	7	1.848	2	green
20	7.5	2.187	2	green
20	8	2.359	2	green
30	6	0.752	2	yellow
30	6.5	1.325	2	yellow
30	7	1.847	2	yellow
30	7.5	2.238	2	yellow
30	8	2.406	2	yellow
40	6	0.847	2	red
40	6.5	1.322	2	red
40	7	1.94	2	red
40	7.5	2.243	2	red
40	8	2.48	2	red
10	6	0.451	3	blue
10	6.5	1.01	3	blue
10	7	1.676	3	blue
10	7.5	2.151	3	blue
10	8	2.334	3	blue
20	6	0.624	3	green
20	7	1.877	3	green
20	7.5	2.272	3	green
20	8	2.448	3	green
30	6	0.637	3	yellow
30	6.5	1.24	3	yellow
30	7	1.813	3	yellow
30	7.5	2.318	3	yellow
30	8	2.544	3	yellow
40	6	0.961	3	red
40	6.5	1.325	3	red
40	7	1.895	3	red
40	7.5	2.46	3	red
40	8	2.649	3	red
10	7	1.486	4	blue
10	7.5	2.058	4	blue
10	8	2.288	4	blue
20	6.5	1.013	4	green
20	7	1.686	4	green
20	7.5	2.178	4	green
20	8	2.45	4	green
30	6.5	1.167	4	yellow
30	7	1.787	4	yellow
30	7.5	2.303	4	yellow
30	8	2.521	4	yellow
40	6.3	0.774	4	red
40	6.5	1.227	4	red
40	7	1.826	4	red

## Sheet: Figure 2D-F
temperature (oC)	pH	calculated [H2PO4-]/[Pi]	pMg	color by temperature
10	6	0.821387	2	blue
10	6.1	0.794104	2	blue
10	6.2	0.760795	2	blue
10	6.3	0.721607	2	blue
10	6.4	0.676945	2	blue
10	6.5	0.62752	2	blue
10	6.6	0.574365	2	blue
10	6.7	0.518802	2	blue
10	6.8	0.462336	2	blue
10	6.9	0.406528	2	blue
10	7	0.352834	2	blue
10	7.1	0.302479	2	blue
10	7.2	0.256363	2	blue
10	7.3	0.215031	2	blue
10	7.4	0.178691	2	blue
10	7.5	0.147268	2	blue
10	7.6	0.12048	2	blue
10	7.7	0.097909	2	blue
10	7.8	0.0790665	2	blue
10	7.9	0.0634442	2	blue
10	8	0.0505469	2	blue
20	6	0.795786	2	green
20	6.1	0.764534	2	green
20	6.2	0.727194	2	green
20	6.3	0.68414	2	green
20	6.4	0.636045	2	green
20	6.5	0.5839	2	green
20	6.6	0.52899	2	green
20	6.7	0.472809	2	green
20	6.8	0.41693	2	green
20	6.9	0.362851	2	green
20	7	0.311859	2	green
20	7.1	0.264932	2	green
20	7.2	0.222689	2	green
20	7.3	0.185408	2	green
20	7.4	0.153068	2	green
20	7.5	0.125426	2	green
20	7.6	0.102087	2	green
20	7.7	0.0825765	2	green
20	7.8	0.0663876	2	green
20	7.9	0.0530229	2	green
20	8	0.0420159	2	green
30	6	0.763452	2	yellow
30	6.1	0.727689	2	yellow
30	6.2	0.685979	2	yellow
30	6.3	0.638993	2	yellow
30	6.4	0.587716	2	yellow
30	6.5	0.533427	2	yellow
30	6.6	0.477623	2	yellow
30	6.7	0.42189	2	yellow
30	6.8	0.367755	2	yellow
30	6.9	0.316544	2	yellow
30	7	0.269277	2	yellow
30	7.1	0.226621	2	yellow
30	7.2	0.188894	2	yellow
30	7.3	0.156108	2	yellow
30	7.4	0.128043	2	yellow
30	7.5	0.104323	2	yellow
30	7.6	0.0844799	2	yellow
30	7.7	0.0680119	2	yellow
30	7.8	0.0544221	2	yellow
30	7.9	0.0432428	2	yellow
30	8	0.0340489	2	yellow
40	6	0.72259	2	red
40	6.1	0.681929	2	red
40	6.2	0.635791	2	red
40	6.3	0.585197	2	red
40	6.4	0.531456	2	red
40	6.5	0.476088	2	red
40	6.6	0.420701	2	red
40	6.7	0.366839	2	red
40	6.8	0.315843	2	red
40	6.9	0.268746	2	red
40	7	0.226225	2	red
40	7.1	0.188605	2	red
40	7.2	0.155906	2	red
40	7.3	0.127916	2	red
40	7.4	0.10426	2	red
40	7.5	0.0844753	2	red
40	7.6	0.068065	2	red
40	7.7	0.0545347	2	red
40	7.8	0.0434204	2	red
40	7.9	0.0343005	2	red
40	8	0.0268018	2	red
10	6	0.834121	3	blue
10	6.1	0.813691	3	blue
10	6.2	0.787004	3	blue
10	6.3	0.754086	3	blue
10	6.4	0.715142	3	blue
10	6.5	0.670631	3	blue
10	6.6	0.621319	3	blue
10	6.7	0.568289	3	blue
10	6.8	0.512899	3	blue
10	6.9	0.456683	3	blue
10	7	0.401208	3	blue
10	7.1	0.347929	3	blue
10	7.2	0.298054	3	blue
10	7.3	0.252461	3	blue
10	7.4	0.211671	3	blue
10	7.5	0.175872	3	blue
10	7.6	0.144976	3	blue
10	7.7	0.118692	3	blue
10	7.8	0.0966008	3	blue
10	7.9	0.078218	3	blue
10	8	0.063044	3	blue
20	6	0.814456	3	green
20	6.1	0.790668	3	green
20	6.2	0.760423	3	green
20	6.3	0.7239	3	green
20	6.4	0.681507	3	green
20	6.5	0.633947	3	green
20	6.6	0.582233	3	green
20	6.7	0.527673	3	green
20	6.8	0.471777	3	green
20	6.9	0.41613	3	green
20	7	0.362244	3	green
20	7.1	0.311416	3	green
20	7.2	0.264631	3	green
20	7.3	0.222515	3	green
20	7.4	0.185353	3	green
20	7.5	0.15313	3	green
20	7.6	0.125608	3	green
20	7.7	0.1024	3	green
20	7.8	0.0830363	3	green
20	7.9	0.0670194	3	green
20	8	0.0538603	3	green
30	6	0.788198	3	yellow
30	6.1	0.760242	3	yellow
30	6.2	0.725728	3	yellow
30	6.3	0.685066	3	yellow
30	6.4	0.638941	3	yellow
30	6.5	0.58835	3	yellow
30	6.6	0.534583	3	yellow
30	6.7	0.479147	3	yellow
30	6.8	0.423643	3	yellow
30	6.9	0.369617	3	yellow
30	7	0.318419	3	yellow
30	7.1	0.271096	3	yellow
30	7.2	0.228339	3	yellow
30	7.3	0.19049	3	yellow
30	7.4	0.15758	3	yellow
30	7.5	0.129407	3	yellow
30	7.6	0.105604	3	yellow
30	7.7	0.0857131	3	yellow
30	7.8	0.0692408	3	yellow
30	7.9	0.0556968	3	yellow
30	8	0.0446206	3	yellow
40	6	0.752838	3	red
40	6.1	0.719861	3	red
40	6.2	0.680455	3	red
40	6.3	0.635351	3	red
40	6.4	0.585584	3	red
40	6.5	0.532474	3	red
40	6.6	0.477557	3	red
40	6.7	0.422458	3	red
40	6.8	0.368744	3	red
40	6.9	0.317783	3	red
40	7	0.270637	3	red
40	7.1	0.228012	3	red
40	7.2	0.19026	3	red
40	7.3	0.157422	3	red
40	7.4	0.129302	3	red
40	7.5	0.105539	3	red
40	7.6	0.0856797	3	red
40	7.7	0.0692337	3	red
40	7.8	0.0557132	3	red
40	7.9	0.0446599	3	red
40	8	0.0356594	3	red
10	6	0.83513	4	blue
10	6.1	0.815623	4	blue
10	6.2	0.78983	4	blue
10	6.3	0.757766	4	blue
10	6.4	0.719617	4	blue
10	6.5	0.675811	4	blue
10	6.6	0.627081	4	blue
10	6.7	0.574478	4	blue
10	6.8	0.519333	4	blue
10	6.9	0.463168	4	blue
10	7	0.407558	4	blue
10	7.1	0.353978	4	blue
10	7.2	0.303672	4	blue
10	7.3	0.257561	4	blue
10	7.4	0.216209	4	blue
10	7.5	0.179842	4	blue
10	7.6	0.148401	4	blue
10	7.7	0.121616	4	blue
10	7.8	0.0990806	4	blue
10	7.9	0.0803167	4	blue
10	8	0.064826	4	blue
20	6	0.816197	4	green
20	6.1	0.793423	4	green
20	6.2	0.76415	4	green
20	6.3	0.728539	4	green
20	6.4	0.686968	4	green
20	6.5	0.640103	4	green
20	6.6	0.588922	4	green
20	6.7	0.534699	4	green
20	6.8	0.478927	4	green
20	6.9	0.423192	4	green
20	7	0.369026	4	green
20	7.1	0.317761	4	green
20	7.2	0.270428	4	green
20	7.3	0.227701	4	green
20	7.4	0.189909	4	green
20	7.5	0.157072	4	green
20	7.6	0.128978	4	green
20	7.7	0.105257	4	green
20	7.8	0.0854483	4	green
20	7.9	0.0690556	4	green
20	8	0.0555896	4	green
30	6	0.790706	4	yellow
30	6.1	0.763826	4	yellow
30	6.2	0.730323	4	yellow
30	6.3	0.690575	4	yellow
30	6.4	0.645234	4	yellow
30	6.5	0.595255	4	yellow
30	6.6	0.541895	4	yellow
30	6.7	0.486639	4	yellow
30	6.8	0.431087	4	yellow
30	6.9	0.376803	4	yellow
30	7	0.325173	4	yellow
30	7.1	0.277291	4	yellow
30	7.2	0.2339	4	yellow
30	7.3	0.195387	4	yellow
30	7.4	0.161825	4	yellow
30	7.5	0.133039	4	yellow
30	7.6	0.108682	4	yellow
30	7.7	0.0883065	4	yellow
30	7.8	0.0714217	4	yellow
30	7.9	0.0575365	4	yellow
30	8	0.0461873	4	yellow
40	6	0.756062	4	red
40	6.1	0.724168	4	red
40	6.2	0.68574	4	red
40	6.3	0.641472	4	red
40	6.4	0.592359	4	red
40	6.5	0.539691	4	red
40	6.6	0.484983	4	red
40	6.7	0.429858	4	red
40	6.8	0.375903	4	red
40	6.9	0.324521	4	red
40	7	0.276824	4	red
40	7.1	0.233569	4	red
40	7.2	0.195155	4	red
40	7.3	0.161665	4	red
40	7.4	0.13293	4	red
40	7.5	0.10861	4	red
40	7.6	0.0882623	4	red
40	7.7	0.0713986	4	red
40	7.8	0.0575305	4	red
40	7.9	0.0461962	4	red
40	8	0.0369765	4	red

## Sheet: Figure 4
Temperature oC	pMg	pH	calculated beta
30	3	6	0.684
30	3	6.1	0.716
30	3	6.2	0.749
30	3	6.3	0.781
30	3	6.4	0.812
30	3	6.5	0.841
30	3	6.6	0.867
30	3	6.7	0.889
30	3	6.8	0.909
30	3	6.9	0.925
30	3	7	0.939
30	3	7.1	0.951
30	3	7.2	0.96
30	3	7.3	0.968
30	3	7.4	0.974
30	3	7.5	0.979
30	3	7.6	0.984
30	3	7.7	0.987
30	3	7.8	0.99
30	3	7.9	0.992
30	3	8	0.993
10	4	6	0.907
10	4	6.1	0.913
10	4	6.2	0.919
10	4	6.3	0.925
10	4	6.4	0.932
10	4	6.5	0.939
10	4	6.6	0.946
10	4	6.7	0.953
10	4	6.8	0.959
10	4	6.9	0.966
10	4	7	0.971
10	4	7.1	0.976
10	4	7.2	0.98
10	4	7.3	0.984
10	4	7.4	0.987
10	4	7.5	0.989
10	4	7.6	0.991
10	4	7.7	0.993
10	4	7.8	0.994
10	4	7.9	0.996
10	4	8	0.996

## Sheet: Figure 5 & A1
[Cr] mM added	[ATP] mM added	Temp oC	pH	pMg	PCr mM	ADP mM	Cr mM	ATP mM	beta (pred)	color by pH	Fig A1 col	Fig A1 row	Fig 4
0	13.206	10	6	2	33.6648	0.00886223	2.01767	10.5431	0.802374	red	1	1	n
0.5	13.206	10	6	2	11.7186	0.01541	2.57068	3.41479	0.802374	red	1	1	n
5	13.206	10	6	2	35.5456	0.0167568	5.01903	10.7259	0.802374	red	1	1	n
50	13.206	10	6	2	22.3859	0.0182787	57.5224	6.55585	0.802374	red	1	1	n
0	12.44	10	6.5	2	24.0492	0.0106161	0.936729	6.37308	0.923613	orange	1	1	n
0.5	12.44	10	6.5	2	36.1351	0.0190125	1.16179	10.1837	0.923613	orange	1	1	n
5	12.44	10	6.5	2	37.4317	0.0147115	5.71336	10.2489	0.923613	orange	1	1	n
50	12.44	10	6.5	2	37.3503	0.0397178	57.3333	10.0473	0.923613	orange	1	1	n
0	12.198	10	7	2	31.1568	0.0232877	0.492922	8.22469	0.974054	green	1	1	n
0.5	12.198	10	7	2	36.1883	0.0100918	0.75145	9.82916	0.974054	green	1	1	n
5	12.198	10	7	2	37.3321	0.0187731	6.36793	9.82044	0.974054	green	1	1	n
50	12.198	10	7	2	26.425	0.057974	52.2137	6.59016	0.974054	green	1	1	n
0	12.122	10	7.5	2	26.2287	0.0144061	0.38945	6.56212	0.9916	cyan	1	1	n
0.5	12.122	10	7.5	2	24.2661	0.0173835	0.782607	6.11714	0.9916	cyan	1	1	n
5	12.122	10	7.5	2	37.203	0.0295163	5.6548	9.63544	0.9916	cyan	1	1	n
50	12.122	10	7.5	2	29.4068	0.135888	55.3412	7.15914	0.9916	cyan	1	1	n
0	12.098	10	8	2	37.2437	0.0122488		9.96231	0.997323	blue	1	1	n
0.5	12.098	10	8	2	36.5905	0.0186593	0.584626	9.66647	0.997323	blue	1	1	n
5	12.098	10	8	2	26.8769	0.051168	5.94275	6.56617	0.997323	blue	1	1	n
50	12.098	10	8	2	36.2092	0.39256	51.6471	8.53665	0.997323	blue	1	1	n
0	13.097	20	6	2	34.134	0.0122667	1.37221	10.7622	0.825215	red	1	2	n
0.5	13.097	20	6	2	34.8664	0.0242124	2.67857	10.7997	0.825215	red	1	2	n
5	13.097	20	6	2	34.1011	0.0162801	7.29703	10.3767	0.825215	red	1	2	n
50	13.097	20	6	2	34.4905	0.028537	60.099	10.417	0.825215	red	1	2	n
0	12.393	20	6.5	2	36.49	0.012669	0.482575	10.042	0.93447	orange	1	2	n
0.5	12.393	20	6.5	2	36.7216	0.0225698	1.25029	10.1203	0.93447	orange	1	2	n
5	12.393	20	6.5	2	32.2852	0.0314583	5.61149	8.39711	0.93447	orange	1	2	n
50	12.393	20	6.5	2	37.1262	0.0454882	56.3749	9.65151	0.93447	orange	1	2	n
0	12.17	20	7	2	36.5448	0.0133261	0.344963	9.84991	0.978003	green	1	2	n
0.5	12.17	20	7	2	37.0407	0.0251294	1.25663	10.0539	0.978003	green	1	2	n
5	12.17	20	7	2	37.1683	0.0231359	6.36483	9.691	0.978003	green	1	2	n
50	12.17	20	7	2	36.9555	0.0862827	56.8612	9.36108	0.978003	green	1	2	n
0	12.1	20	7.5	2	31.0817	0.0220864	0.468156	7.93719	0.992907	cyan	1	2	n
0.5	12.1	20	7.5	2	37.2109	0.0205478	1.03522	9.84549	0.992907	cyan	1	2	n
5	12.1	20	7.5	2	37.7105	0.0344356	1.46213	9.63125	0.992907	cyan	1	2	n
50	12.1	20	7.5	2	34.4196	0.124975	54.1649	8.36661	0.992907	cyan	1	2	n
0	12.078	20	8	2	36.8287	0.0119364		9.61736	0.997743	blue	1	2	n
0.5	12.078	20	8	2	35.607	0.015123	1.07144	9.17303	0.997743	blue	1	2	n
5	12.078	20	8	2	37.724	0.080593	6.00299	9.44112	0.997743	blue	1	2	n
50	12.078	20	8	2	38.2645	0.495306	53.195	8.80952	0.997743	blue	1	2	n
0	13.001	30	6	2	29.4675	0.0186954	2.20621	10.7017	0.846738	red	1	3	n
0.5	13.001	30	6	2	29.3704	0.0211648	2.61351	10.8572	0.846738	red	1	3	n
5	13.001	30	6	2	29.3849	0.0204993	8.32302	10.698	0.846738	red	1	3	n
50	13.001	30	6	2	29.7105	0.0172679	58.2261	10.7665	0.846738	red	1	3	n
0	12.352	30	6.5	2	32.9086	0.0179499	0.973239	10.3525	0.944062	orange	1	3	n
0.5	12.352	30	6.5	2	32.3443	0.021565	2.34497	10.1228	0.944062	orange	1	3	n
5	12.352	30	6.5	2	32.9446	0.00873344	6.75565	10.103	0.944062	orange	1	3	n
50	12.352	30	6.5	2	32.6895	0.0431405	56.416	9.98029	0.944062	orange	1	3	n
0	12.147	30	7	2	33.0512	0.0186694	0.424195	10.0038	0.981412	green	1	3	n
0.5	12.147	30	7	2	32.2354	0.021292	1.44867	9.71526	0.981412	green	1	3	n
5	12.147	30	7	2	33.4824	0.0158725	6.17429	9.9783	0.981412	green	1	3	n
50	12.147	30	7	2	33.68	0.104511	56.0897	9.82339	0.981412	green	1	3	n
0	12.083	30	7.5	2	33.7061	0.00747656	0.24061	9.87601	0.994026	cyan	1	3	n
0.5	12.083	30	7.5	2	33.6162	0.0206885	1.40689	9.87198	0.994026	cyan	1	3	n
5	12.083	30	7.5	2	33.8344	0.0422951	5.53815	9.75589	0.994026	cyan	1	3	n
50	12.083	30	7.5	2	34.9246	0.280658	59.0504	9.58113	0.994026	cyan	1	3	n
0	12.062	30	8	2	33.1323	0.00892754	0.137929	9.69945	0.998101	blue	1	3	n
0.5	12.062	30	8	2	34.0332	0.0354027	1.21554	9.96669	0.998101	blue	1	3	n
5	12.062	30	8	2	33.5947	0.104247	6.10119	9.56704	0.998101	blue	1	3	n
50	12.062	30	8	2	34.9896	0.698655	53.7203	8.99353	0.998101	blue	1	3	n
0	12.917	40	6	2	27.0905	0.0149485	7.36753	10.5682	0.866538	red	1	4	n
0.5	12.917	40	6	2	27.0358	0.012267	7.99425	10.4839	0.866538	red	1	4	n
5	12.917	40	6	2	22.4316	0.0232365	13.5332	8.5754	0.866538	red	1	4	n
50	12.917	40	6	2	22.3277	0.0440161	62.9624	8.49765	0.866538	red	1	4	n
0	12.319	40	6.5	2	31.4621	0.0143491	3.8409	9.88886	0.952416	orange	1	4	n
0.5	12.319	40	6.5	2	21.0814	0.0190185	4.77298	6.35181	0.952416	orange	1	4	n
5	12.319	40	6.5	2	32.0191	0.0268126	9.11282	9.88983	0.952416	orange	1	4	n
50	12.319	40	6.5	2	30.0575	0.0741708	62.0564	9.04216	0.952416	orange	1	4	n
0	12.129	40	7	2	34.5908	0.0137134	1.91433	9.92896	0.984324	green	1	4	n
0.5	12.129	40	7	2	34.5931	0.0141625	2.61338	9.92153	0.984324	green	1	4	n
5	12.129	40	7	2	34.6905	0.0256297	7.25036	9.61314	0.984324	green	1	4	n
50	12.129	40	7	2	28.4842	0.117416	59.5086	7.32925	0.984324	green	1	4	n
0	12.07	40	7.5	2	30.6239	0.0167185	0.980904	8.08574	0.994976	cyan	1	4	n
0.5	12.07	40	7.5	2	25.5023	0.0194722	1.53838	6.59809	0.994976	cyan	1	4	n
5	12.07	40	7.5	2	36.2969	0.0794163	6.64833	9.54173	0.994976	cyan	1	4	n
50	12.07	40	7.5	2	32.6618	0.273211	56.51	7.89175	0.994976	cyan	1	4	n
0	12.051	40	8	2	36.5348	0.0272814	0.458449	9.7269	0.998405	blue	1	4	n
0.5	12.051	40	8	2	26.0688	0.0292222	1.31515	6.78816	0.998405	blue	1	4	n
5	12.051	40	8	2	37.521	0.11922	5.64937	9.60681	0.998405	blue	1	4	n
50	12.051	40	8	2	33.7552	0.699701	56.7956	7.40768	0.998405	blue	1	4	n
0	12.05	10	6	3	34.0465	0.00968034	1.77196	9.53346	0.698536	red	2	1	n
0.5	12.05	10	6	3	30.1342	0.00941794	3.03041	8.38975	0.698536	red	2	1	n
5	12.05	10	6	3	21.9982	0.0264569	8.42559	6.13032	0.698536	red	2	1	n
50	12.05	10	6	3	25.8335	0.0216644	56.3685	6.93395	0.698536	red	2	1	n
0	10.074	10	6.5	3	35.8685	0.0172447	0.697603	7.91189	0.831474	orange	2	1	n
0.5	10.074	10	6.5	3	36.0931	0.016448	1.36302	7.92747	0.831474	orange	2	1	n
5	10.074	10	6.5	3	36.2669	0.018755	6.56614	7.86008	0.831474	orange	2	1	n
50	10.074	10	6.5	3	35.6935	0.0268141	55.1718	7.62233	0.831474	orange	2	1	n
0	9.457	10	7	3	36.5753	0.0169451	0.400536	7.5684	0.932107	green	2	1	n
0.5	9.457	10	7	3	36.381	0.0224441	1.84883	7.56066	0.932107	green	2	1	n
5	9.457	10	7	3	37.609	0.00984699	5.77103	7.63115	0.932107	green	2	1	n
50	9.457	10	7	3	37.5507	0.0732739	55.7816	7.45444	0.932107	green	2	1	n
0	9.263	10	7.5	3	37.368	0.0190093	0.271694	7.40865	0.976599	cyan	2	1	n
0.5	9.263	10	7.5	3	37.5687	0.00970837	1.61719	7.35283	0.976599	cyan	2	1	n
5	9.263	10	7.5	3	38.0545	0.0311165	6.46556	7.3344	0.976599	cyan	2	1	n
50	9.263	10	7.5	3	37.7641	0.19436	56.413	6.97703	0.976599	cyan	2	1	n
0	9.202	10	8	3	37.9723	0.00732022	0.237015	7.39879	0.992387	blue	2	1	n
0.5	9.202	10	8	3	37.8743	0.0101349	0.735506	7.4038	0.992387	blue	2	1	n
5	9.202	10	8	3	37.4702	0.0693092	6.09992	7.0766	0.992387	blue	2	1	n
50	9.202	10	8	3	38.5397	0.509052	56.5168	6.67955	0.992387	blue	2	1	n
0	11.46	20	6	3	35.5564	0.0163056	1.28298	9.05943	0.688488	red	2	2	n
0.5	11.46	20	6	3	34.6604	0.0173699	2.20482	8.94562	0.688488	red	2	2	n
5	11.46	20	6	3	35.7044	0.0199941	6.81613	8.95244	0.688488	red	2	2	n
50	11.46	20	6	3	35.6108	0.037277	54.2408	8.95564	0.688488	red	2	2	n
0	9.758	20	6.5	3	33.8856	0.0236359	0.539587	7.32606	0.834829	orange	2	2	n
0.5	9.758	20	6.5	3	35.0359	0.0120676	1.83788	7.57395	0.834829	orange	2	2	n
5	9.758	20	6.5	3	33.3308	0.0155334	6.41415	6.91943	0.834829	orange	2	2	n
50	9.758	20	6.5	3	33.1566	0.0444727	53.6177	6.80655	0.834829	orange	2	2	n
0	9.225	20	7	3	34.4843	0.0224782	0.330104	6.95188	0.935236	green	2	2	n
0.5	9.225	20	7	3	35.9293	0.0232264	1.19916	7.35134	0.935236	green	2	2	n
5	9.225	20	7	3	37.8824	0.018953	4.7003	7.50833	0.935236	green	2	2	n
50	9.225	20	7	3	38.0843	0.0968595	58.1919	7.30839	0.935236	green	2	2	n
0	9.057	20	7.5	3	36.5242	0.0141807		7.35434	0.977908	cyan	2	2	n
0.5	9.057	20	7.5	3	36.6236	0.0180403	1.51748	7.30437	0.977908	cyan	2	2	n
5	9.057	20	7.5	3	36.2552	0.0496603	6.06994	7.00547	0.977908	cyan	2	2	n
50	9.057	20	7.5	3	38.6007	0.296285	52.9203	7.045	0.977908	cyan	2	2	n
0	9.004	20	8	3	35.5619	0.0150329		6.99493	0.992838	blue	2	2	n
0.5	9.004	20	8	3	35.9352	0.0229238	1.09395	7.05643	0.992838	blue	2	2	n
5	9.004	20	8	3	37.3341	0.0874049	5.80027	7.07214	0.992838	blue	2	2	n
50	9.004	20	8	3	28.5558	0.2613	49.2395	4.95765	0.992838	blue	2	2	n
0	10.982	30	6	3	30.2	0.0191656	2.40524	9.09895	0.684046	red	2	3	Y
0.5	10.982	30	6	3	29.5868	0.00677462	3.21725	9.06107	0.684046	red	2	3	Y
5	10.982	30	6	3	30.7007	0.0249246	8.05212	9.09325	0.684046	red	2	3	Y
50	10.982	30	6	3	29.5064	0.0292034	57.7011	8.90409	0.684046	red	2	3	Y
0	9.509	30	6.5	3	16.2465	0.0101887	0.939692	3.68315	0.840857	orange	2	3	Y
0.5	9.509	30	6.5	3	32.2943	0.0178204	1.67609	7.46751	0.840857	orange	2	3	Y
5	9.509	30	6.5	3	32.8552	0.0176418	6.45699	7.50296	0.840857	orange	2	3	Y
50	9.509	30	6.5	3	31.9695	0.0469441	57.4831	7.19349	0.840857	orange	2	3	Y
0	9.047	30	7	3	33.4179	0.0175115	0.443003	7.18244	0.939161	green	2	3	Y
0.5	9.047	30	7	3	33.7021	0.0131452	1.05892	7.29585	0.939161	green	2	3	Y
5	9.047	30	7	3	33.991	0.0285118	6.37486	7.1982	0.939161	green	2	3	Y
50	9.047	30	7	3	34.3353	0.106053	55.0305	7.15934	0.939161	green	2	3	Y
0	8.902	30	7.5	3	33.3651	0.0181834	0.233236	7.1084	0.979445	cyan	2	3	Y
0.5	8.902	30	7.5	3	32.5002	0.00900065	0.761796	6.91309	0.979445	cyan	2	3	Y
5	8.902	30	7.5	3	33.6997	0.0407292	5.82525	7.01252	0.979445	cyan	2	3	Y
50	8.902	30	7.5	3	34.271	0.273863	57.3736	6.75928	0.979445	cyan	2	3	Y
0	8.856	30	8	3	37.4202	0.0104407	0.280031	7.26914	0.993358	blue	2	3	Y
0.5	8.856	30	8	3	36.5534	0.0263439	0.841456	7.1368	0.993358	blue	2	3	Y
5	8.856	30	8	3	36.9377	0.100404	6.11869	6.96455	0.993358	blue	2	3	Y
50	8.856	30	8	3	38.8001	0.712407	53.6084	6.4248	0.993358	blue	2	3	Y
0	10.592	40	6	3	27.8118	0.016205	6.58612	8.65087	0.685364	red	2	4	n
0.5	10.592	40	6	3	20.4004	0.016706	8.44489	6.23082	0.685364	red	2	4	n
5	10.592	40	6	3	27.229	0.024518	13.8873	8.35155	0.685364	red	2	4	n
50	10.592	40	6	3	27.6928	0.067382	57.4752	8.42481	0.685364	red	2	4	n
0	9.313	40	6.5	3	28.9604	0.014362	5.49	7.71751	0.84914	orange	2	4	n
0.5	9.313	40	6.5	3	28.564	0.016484	6.64396	7.60931	0.84914	orange	2	4	n
5	9.313	40	6.5	3	28.9666	0.023969	3.89777	7.56682	0.84914	orange	2	4	n
50	9.313	40	6.5	3	29.1349	0.087586	56.7476	7.45287	0.84914	orange	2	4	n
0	8.911	40	7	3	9.78527	0.083858	2.99218	2.01574	0.943669	green	2	4	n
0.5	8.911	40	7	3	30.266	0.019017	4.25433	6.60966	0.943669	green	2	4	n
5	8.911	40	7	3	32.9184	0.032029	8.85505	7.18331	0.943669	green	2	4	n
50	8.911	40	7	3	33.52	0.132175	56.7602	7.07006	0.943669	green	2	4	n
0	8.784	40	7.5	3	9.54873	0.007888	0.763458	1.70575	0.981134	cyan	2	4	n
0.5	8.784	40	7.5	3	27.1256	0.026637	1.55198	5.09802	0.981134	cyan	2	4	n
5	8.784	40	7.5	3	29.4859	0.062319	6.43117	5.45908	0.981134	cyan	2	4	n
50	8.784	40	7.5	3	36.8408	0.35333	58.2146	6.47613	0.981134	cyan	2	4	n
0	8.744	40	8	3	36.7109	0.012261	0.395943	7.21465	0.993921	blue	2	4	n
0.5	8.744	40	8	3	22.7259	0.03471	0.91522	4.05727	0.993921	blue	2	4	n
5	8.744	40	8	3	37.4945	0.121995	5.70156	6.94177	0.993921	blue	2	4	n
50	8.744	40	8	3	35.0791	0.749511	55.301	5.45999	0.993921	blue	2	4	n
0	22.14	10	6.63	4	35.8383	0.006644	0.668781	18.0756	0.947894	orange	3	1	n
0.5	22.14	10	6.63	4	35.6022	0.012629	1.44748	17.9834	0.947894	orange	3	1	n
5	22.14	10	6.63	4	35.9509	0.056882	7.78102	17.9815	0.947894	orange	3	1	n
50	22.14	10	6.63	4	36.3633	0.360674	54.5485	17.565	0.947894	orange	3	1	n
0	17.771	10	7	4	37.0238	0.023572	0.492043	14.086	0.971125	green	3	1	n
0.5	17.771	10	7	4	34.2078	0.01043	1.11304	12.8117	0.971125	green	3	1	n
5	17.771	10	7	4	37.5116	0.064951	6.77909	13.9344	0.971125	green	3	1	n
50	17.771	10	7	4	36.307	0.285899	56.4286	12.9269	0.971125	green	3	1	n
0	16.397	10	7.5	4	34.0701	0.012282	0.409861	11.7836	0.989336	cyan	3	1	n
0.5	16.397	10	7.5	4	37.6598	0.019966	0.770747	13.0054	0.989336	cyan	3	1	n
5	16.397	10	7.5	4	38.035	0.076825	5.48803	12.9701	0.989336	cyan	3	1	n
50	16.397	10	7.5	4	38.5258	0.628997	55.2218	11.9988	0.989336	cyan	3	1	n
0	15.963	10	8	4	37.3523	0.024499	0.294678	12.667	0.996445	blue	3	1	n
0.5	15.963	10	8	4	37.1303	0.057434	0.800452	12.6353	0.996445	blue	3	1	n
5	15.963	10	8	4	38.3608	0.282074	6.21478	12.4704	0.996445	blue	3	1	n
50	15.963	10	8	4	39.1279	1.16591	57.1002	11.3265	0.996445	blue	3	1	n
0	19.138	20	6.5	4	33.393	0.01222	0.796672	13.9637	0.928413	orange	3	2	n
0.5	19.138	20	6.5	4	35.5383	0.015083	1.37106	14.9759	0.928413	orange	3	2	n
5	19.138	20	6.5	4	36.5566	0.02809	5.81615	15.1191	0.928413	orange	3	2	n
50	19.138	20	6.5	4	24.8998	0.11005	55.5628	9.63527	0.928413	orange	3	2	n
0	15.499	20	7	4	36.4428	0.012982	0.396888	12.3458	0.966758	green	3	2	n
0.5	15.499	20	7	4	36.1571	0.018119	1.03679	12.21	0.966758	green	3	2	n
5	15.499	20	7	4	33.4517	0.053731	5.77707	10.8238	0.966758	green	3	2	n
50	15.499	20	7	4	35.8402	0.263684	52.6711	11.2148	0.966758	green	3	2	n
0	14.354	20	7.5	4	36.5793	0.014357	0.370222	11.4445	0.98782	cyan	3	2	n
0.5	14.354	20	7.5	4	35.0849	0.056367	1.76826	10.8973	0.98782	cyan	3	2	n
5	14.354	20	7.5	4	38.233	0.101537	5.72279	11.4924	0.98782	cyan	3	2	n
50	14.354	20	7.5	4	38.4618	0.667686	50.4556	10.5153	0.98782	cyan	3	2	n
0	13.992	20	8	4	37.0513	0.017382		11.3008		blue	3	2	n
0.5	13.992	20	8	4	35.9272	0.117401	1.47953	10.7459	0.995952	blue	3	2	n
5	13.992	20	8	4	37.4866	0.259332	6.14	10.6801	0.995952	blue	3	2	n
50	13.992	20	8	4	40.2464	1.3872	51.6728	9.56741	0.995952	blue	3	2	n
0	16.804	30	6.5	4	35.4357	0.0172211	1.24645	13.0757	0.916922	orange	3	3	n
0.5	16.804	30	6.5	4	35.1682	0.0181813	1.78256	12.9658	0.916922	orange	3	3	n
5	16.804	30	6.5	4	36.0119	0.0306507	6.83984	13.1709	0.916922	orange	3	3	n
50	16.804	30	6.5	4	36.3316	0.178407	56.0306	12.8599	0.916922	orange	3	3	n
0	13.771	30	7	4	36.0491	0.00851083	0.654117	11.0185	0.962088	green	3	3	n
0.5	13.771	30	7	4	37.4815	0.0108071	1.0021	11.51	0.962088	green	3	3	n
5	13.771	30	7	4	37.1187	0.042959	6.23195	11.0477	0.962088	green	3	3	n
50	13.771	30	7	4	38.7532	0.292916	57.8348	11.1859	0.962088	green	3	3	n
0.5	12.815	30	7.5	4	36.6423	0.026754	0.95779	10.354	0.986231	cyan	3	3	n
5	12.815	30	7.5	4	37.858	0.0952691	5.5536	10.377	0.986231	cyan	3	3	n
50	12.815	30	7.5	4	39.5758	0.657062	52.0642	9.84631	0.986231	cyan	3	3	n
0	12.51	30	8	4	36.7763	0.0199673		9.45612		blue	3	3	n
0.5	12.51	30	8	4	36.611	0.0590391	0.685509	9.38534	0.995438	blue	3	3	n
5	12.51	30	8	4	21.3835	0.100473	5.92127	4.91416	0.995438	blue	3	3	n
50	12.51	30	8	4	30.4288	0.878219	54.5189	5.96605	0.995438	blue	3	3	n
0	23.067	40	6.3	4	26.2241	0.0495758	7.91587	18.1387	0.881202	red	3	4	n
0.5	23.067	40	6.3	4	26.2823	0.0517262	8.31147	18.2963	0.881202	red	3	4	n
5	23.067	40	6.3	4	20.6708	0.0656672	14.3193	14.1456	0.881202	red	3	4	n
50	23.067	40	6.3	4	26.8126	0.260233	65.1093	18.4978	0.881202	red	3	4	n
0	14.985	40	6.5	4	25.743	0.0211784	4.30299	9.62728	0.904676	orange	3	4	n
0.5	14.985	40	6.5	4	30.704	0.0274941	4.73082	11.8204	0.904676	orange	3	4	n
5	14.985	40	6.5	4	31.8025	0.0475692	10.1725	12.0176	0.904676	orange	3	4	n
50	14.985	40	6.5	4	27.468	0.180794	60.0439	9.929	0.904676	orange	3	4	n
0	12.453	40	7	4	27.9203	0.0209576	1.98517	7.92314	0.957372	green	3	4	n
0.5	12.453	40	7	4	33.5805	0.0257764	2.60767	9.87946	0.957372	green	3	4	n
5	12.453	40	7	4	34.2024	0.0550812	7.79082	9.81189	0.957372	green	3	4	n
50	12.453	40	7	4	35.0282	0.288222	56.0719	9.49033	0.957372	green	3	4	n
0	11.65	40	7.5	4	35.9827	0.0230724	0.935974	9.46547	0.984664	cyan	3	4	n
0.5	11.65	40	7.5	4	15.2933	0.0190994	1.47656	3.75434	0.984664	cyan	3	4	n
5	11.65	40	7.5	4	32.0872	0.0922698	6.55748	7.94731	0.984664	cyan	3	4	n
50	11.65	40	7.5	4	32.0548	0.516664	54.4027	7.13655	0.984664	cyan	3	4	n
0	11.4	40	8	4	29.5409	0.0206053	0.499342	7.10845	0.994937	blue	3	4	n
0.5	11.4	40	8	4	36.9759	0.113668	1.22929	9.25778	0.994937	blue	3	4	n
5	11.4	40	8	4	27.6148	0.396694	5.71327	6.02408	0.994937	blue	3	4	n
50	11.4	40	8	4	26.2383	1.43612	55.3816	3.96102	0.994937	blue	3	4	n

## Sheet: Figure 6
temperature oC	pMg	Keq x 1e-9 from data	Keq SE x 1e-9 from data	predicted Keq x 1e-9
10	2	2.902	0.119	2.64492
20	2	2.38	0.111	2.33813
30	2	1.859	0.05	2.03135
40	2	1.67	0.063	1.72456
10	3	1.613	0.069	1.97755
20	3	2.269	0.4	1.67076
30	3	1.075	0.036	1.36397
40	3	0.968	0.056	1.05719
10	4	1.206	0.112	1.31017
20	4	0.772	0.04	1.00338
30	4	0.976	0.112	0.696598
40	4	0.518	0.028	0.389812

## Sheet: Figure 7A
intact muscle	substrate	[Pi] (mM) msol	dGATP (kJ.mol) msol	Frel msol
mouse soleus	control	6	-58.9	1
mouse soleus	pyruvate	1	-66.9	1.2

## Sheet: Figure 7B
skinned fibers	Pi mM	dGATP kJ/mol	Frenorm_1_0	Frenorm_6_0
rabbit psoas	0.1	-77.1	1.192
rabbit psoas	30	-63.4	0.673
rabbit psoas	30	-63.4	0.646
rabbit psoas	30	-63.4	0.701
rabbit psoas	30	-63.4	0.603
rabbit psoas	30	-63.4	0.381
rabbit psoas	30	-63.4	0.666
rabbit psoas	30	-63.4	0.623
rabbit psoas	20	-64.3	0.789
rabbit psoas	20	-64.3	0.806
rabbit psoas	20	-64.3	0.798
rabbit psoas	20	-64.3	0.808
rabbit psoas	20	-64.3	0.697
rabbit psoas	15	-65	0.767
rabbit psoas	15	-65	0.771
rabbit psoas	5	-67.6	0.848
rabbit psoas	5	-67.6	0.925
rabbit psoas	1	-71.4	1.102
rabbit psoas	0.2	-75.5	1.164
rabbit psoas	20	-64.5	0.742
rabbit psoas	0.2	-75.5	1.127
rabbit psoas	25	-64	0.777
rabbit psoas	10	-66.2	0.909
rabbit psoas	25	-64	0.789
rabbit psoas	25	-64	0.781
rabbit psoas	10	-66.2	0.903
rabbit psoas	10	-66.2	0.897
rabbit psoas	20	-64.5	0.794
rabbit psoas	10	-66.2	0.866
rabbit psoas	20	-64.5	0.788
rabbit psoas	15	-65.2	0.86
rabbit psoas	15	-65.2	0.858
rabbit psoas	15	-65.2	0.853
rabbit psoas	15	-65.2	0.801
rabbit psoas	15	-65.2	0.8
rabbit psoas	36	-63.1	0.586
rabbit psoas	36	-63.1	0.683
rabbit psoas	36	-63.1	0.622
rabbit soleus	0.1	-77.1		1.277
rabbit soleus	1	-71.4		1.223
rabbit soleus	30	-63.4		0.886
rabbit soleus	30	-63.4		0.86
rabbit soleus	1	-71.4		1.165
rabbit soleus	1	-71.4		1.215
rabbit soleus	30	-63.4		0.855
rabbit soleus	30	-63.4		0.869
rabbit soleus	20	-64.3		1.106
rabbit soleus	20	-64.3		0.969
rabbit soleus	20	-64.3		0.929
rabbit soleus	1	-71.4		1.116
rabbit soleus	20	-64.3		0.97
rabbit soleus	20	-64.3		0.934
rabbit soleus	10	-65.9		0.963
rabbit soleus	15	-65		0.919
rabbit soleus	5	-67.6		0.936
rabbit soleus	5	-67.6		0.918
rabbit soleus	15	-65		0.9
rabbit soleus	15	-65		0.909
rabbit soleus	15	-65		0.833
rabbit soleus	20	-64.5		0.86
rabbit soleus	20	-64.5		0.885
rabbit soleus	0.2	-75.5		1.217
rabbit soleus	20	-64.5		0.878
rabbit soleus	25	-64		0.932
rabbit soleus	10	-66.2		1.005
rabbit soleus	25	-64		0.89
rabbit soleus	10	-66.2		0.989
rabbit soleus	10	-66.2		0.984
rabbit soleus	20	-64.5		0.931
rabbit soleus	10	-66.2		0.986
rabbit soleus	20	-64.5		0.932

## Sheet: Figure 8
muscle	prep	pH	[ADP] (uM) ps	dGATP kJ/mol	Frel	Frel SD
rabbit psoas	skinned	7.1	0.1365	-71.4368	1
rabbit psoas	skinned	6	0.0125	-81.859	0.502	0.003
rabbit psoas	skinned	6.5	0.0356	-76.5642	0.719	0.012
rabbit psoas	skinned	7.3	0.2153	-70.0062	1.108	0.02
rabbit psoas	skinned	7.5	0.3402	-68.6798	1.196	0.031
rabbit psoas	skinned	8	1.072	-65.6708	1.405	0.016
rabbit psoas	skinned	6	0.0125	-81.859	0.51	0.011
rabbit soleus	skinned	7.1	0.1365	-71.4368	1	0
rabbit soleus	skinned	6	0.0125	-81.859	0.649	0.001
rabbit soleus	skinned	6.5	0.0356	-76.5642	0.87	0.032
rabbit soleus	skinned	7.3	0.2153	-70.0062	1.034	0.026
rabbit soleus	skinned	7.5	0.3402	-68.6798	1.086	0.029
rabbit soleus	skinned	8	1.072	-65.6708	1.119	0.037
cat soleus	intact	7.09	27.6	-57.3361	1	0.105882
cat soleus	intact	6.48	5.68	-63.5996	0.941176	0.111765
cat biceps	intact	7.11	16.3	-64.5507	1	0.130081
cat biceps	intact	6.6	5.75	-69.2014	0.840108	0.111111

## Sheet: Figure C1
skinned fibers	pCa	Fnorm_0_1P	Fnorm_20P
rabbit psoas	10	0	0
rabbit psoas	6	0.43	0.038
rabbit psoas	5.75	0.742	0.355
rabbit psoas	5.5	0.914	0.538
rabbit psoas	5.25	0.93	0.619
rabbit psoas	4.5	1	0.662
rabbit psoas	10	0	0
rabbit psoas	6	0.317	0.078
rabbit psoas	5.75	0.701	0.431
rabbit psoas	5.5	0.91	0.592
rabbit psoas	5.25	0.97	0.628
rabbit psoas	4.5	1	0.676
rabbit psoas	10	0	0
rabbit psoas	6.5	0
rabbit psoas	6.25	0.05	0.003
rabbit psoas	5.75		0.411
rabbit psoas	5	0.997	0.689
rabbit psoas	4.75	1.011	0.696
rabbit psoas	4.5	1	0.67
rabbit psoas	10	0	0
rabbit psoas	6.5	0
rabbit psoas	6.25	0.029	0.003
rabbit psoas	5.75		0.465
rabbit psoas	5	1.036	0.725
rabbit psoas	4.75	1.04	0.707
rabbit psoas	4.5	1	0.678
rabbit soleus	10	0	0
rabbit soleus	6	0.455	0.217
rabbit soleus	5.75	0.71	0.452
rabbit soleus	5.5	0.893	0.607
rabbit soleus	5.25	0.941	0.759
rabbit soleus	4.5	1	0.831
rabbit soleus	10	0	0
rabbit soleus	6.5	0.024	0.008
rabbit soleus	5.75	0.557	0.304
rabbit soleus	5	0.976	0.743
rabbit soleus	4.75	0.984	0.755
rabbit soleus	4.5	1	0.759
rabbit soleus	10	0	0
rabbit soleus	6.25	0.093	0.039
rabbit soleus	6	0.38	0.161
rabbit soleus	5.5	0.786	0.555
rabbit soleus	4.75	0.973	0.713
rabbit soleus	4.5	1	0.728

[truncated: 3 more sheets: Figure C2, Figure C3, calculation]
